# Supplementary material
Source: PubMed Central journal article supplement (PMC4734553)
Supplement: supp_pp.15.00786_PP2015-00786R2_Supplemental_Materialfigs.pdf [file supp_pp.15.00786_PP2015-00786R2_Supplemental_Materialfigs.pdf]

50  $\mu\text{M}$   $\text{SO}_4^{2-}$  / 500  $\mu\text{M}$  MTA

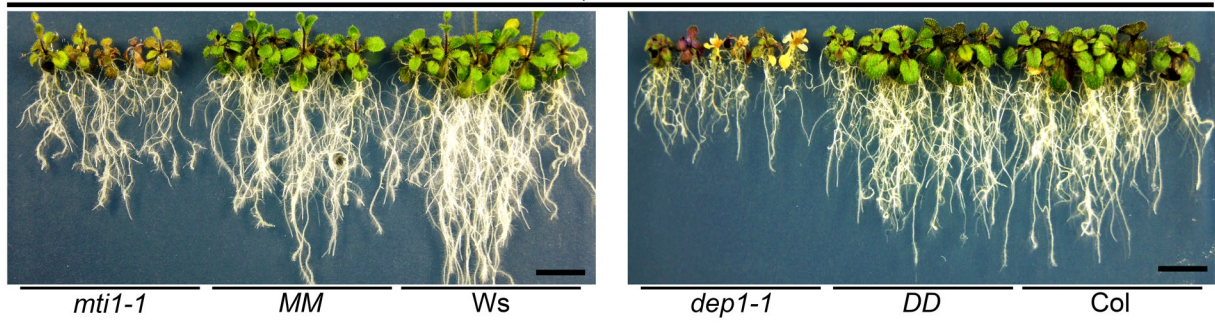

**Figure S1.** *MT1* and *DEP1* WT alleles complement mutant growth phenotypes on MTA containing media. Growth of *mti1-1* and *dep1-1* mutant plants together with the corresponding WT plants and mutant lines complemented with the corresponding WT alleles on medium containing 50  $\mu\text{M}$  sulfate and 500  $\mu\text{M}$  MTA as sulfur sources. Scale bars are 1 cm.

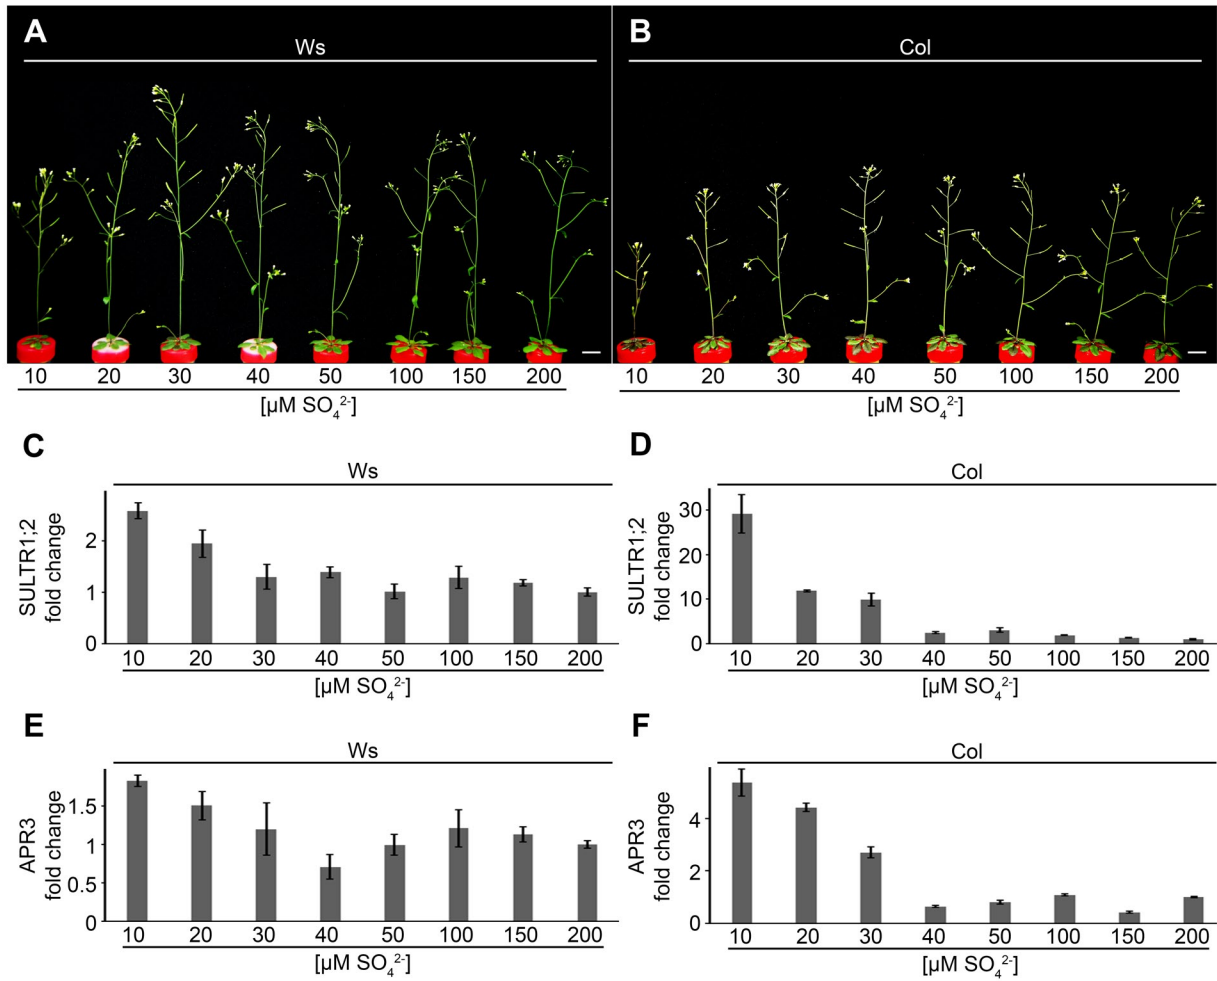

**Figure S2.** S-deficiency response in WT plants. (A-F) Growth of 5-week-old WT plants in Hoagland medium containing 10, 20, 30, 40, 50, 100, 150 or 200  $\mu\text{M}$  sulfate. (A) Habitus of Ws plants. (B) Habitus of Col plants. Scale bars are 1 cm. (C-F) Relative expression of *SULTR1;2* and *APR3* in plants grown in Hoagland medium containing 10, 20, 30, 40, 50, 100, 150, or 200  $\mu\text{M}$  sulfate. Bars represent mean values and standard errors calculated with data from 3 individual measurements.

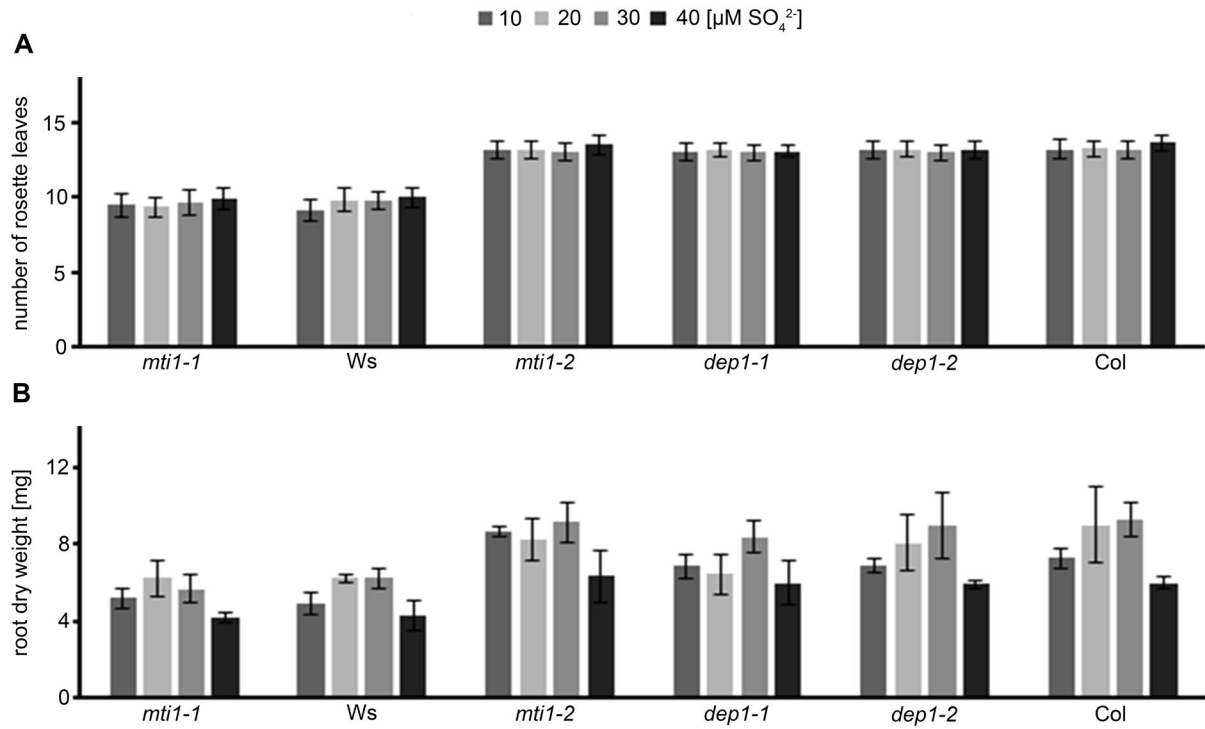

**Figure S3.** Number of rosette leaves and root dry weight. (A) Rosette leaf quantification of 5-week-old flowering plants. Bars represent mean values and standard errors calculated with data from at least 20 plants. (B) Root dry weight of 5-week-old flowering plants. Bars represent mean values and standard errors calculated with data from 3 independent root pools each containing roots from at least 10 different plants.

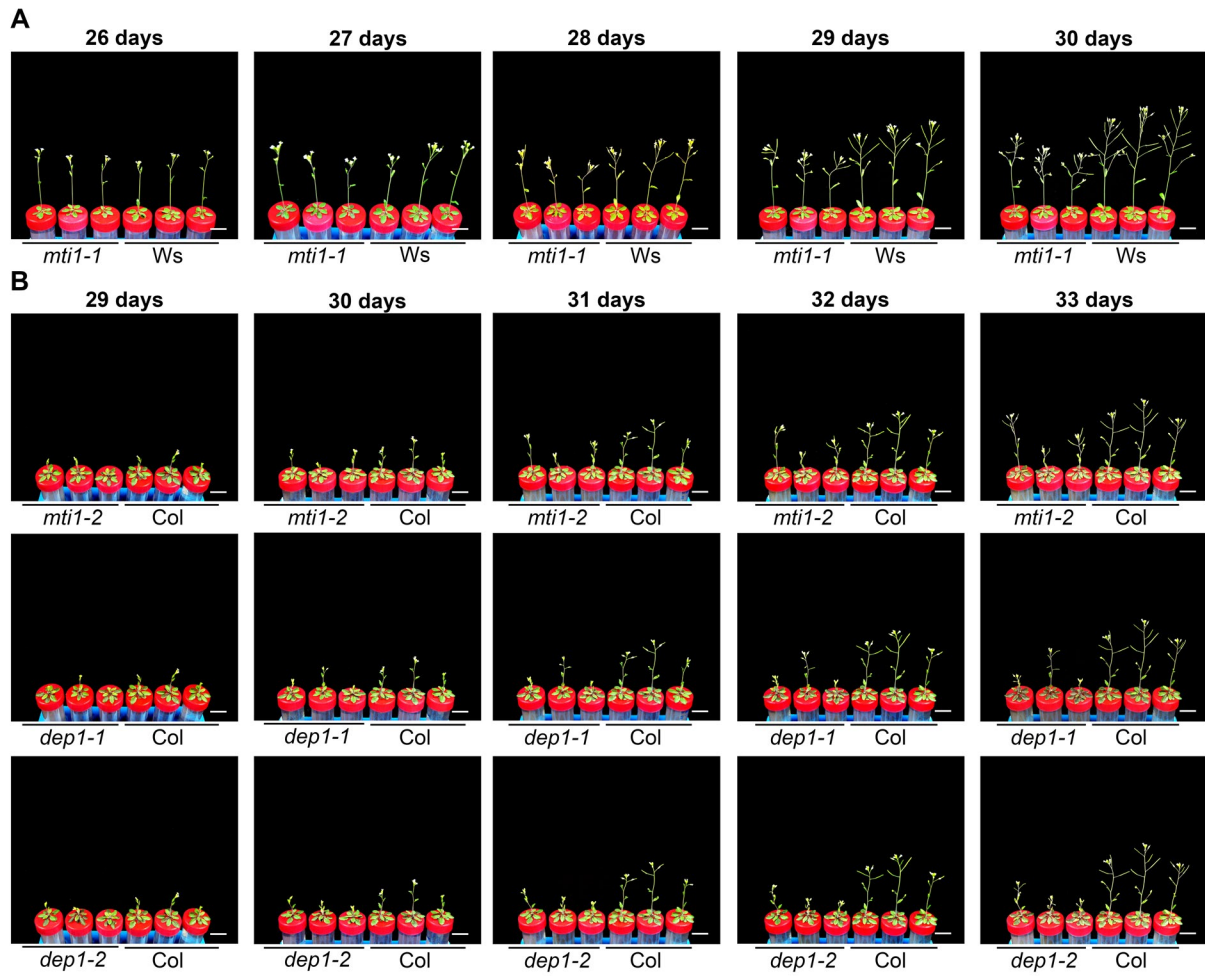

**Figure S4.** Time course of mutant growth during S deficiency. (A) Growth of *mti-1* and Ws plants in Hoagland medium containing 10  $\mu$ M sulfate. (B) Growth of *mti-2*, *dep1-1*, *dep1-2* and Col plants in Hoagland medium containing 10  $\mu$ M sulfate. Pictures were taken daily starting right before the mutant growth inhibition became apparent. Scale bars are 1 cm.

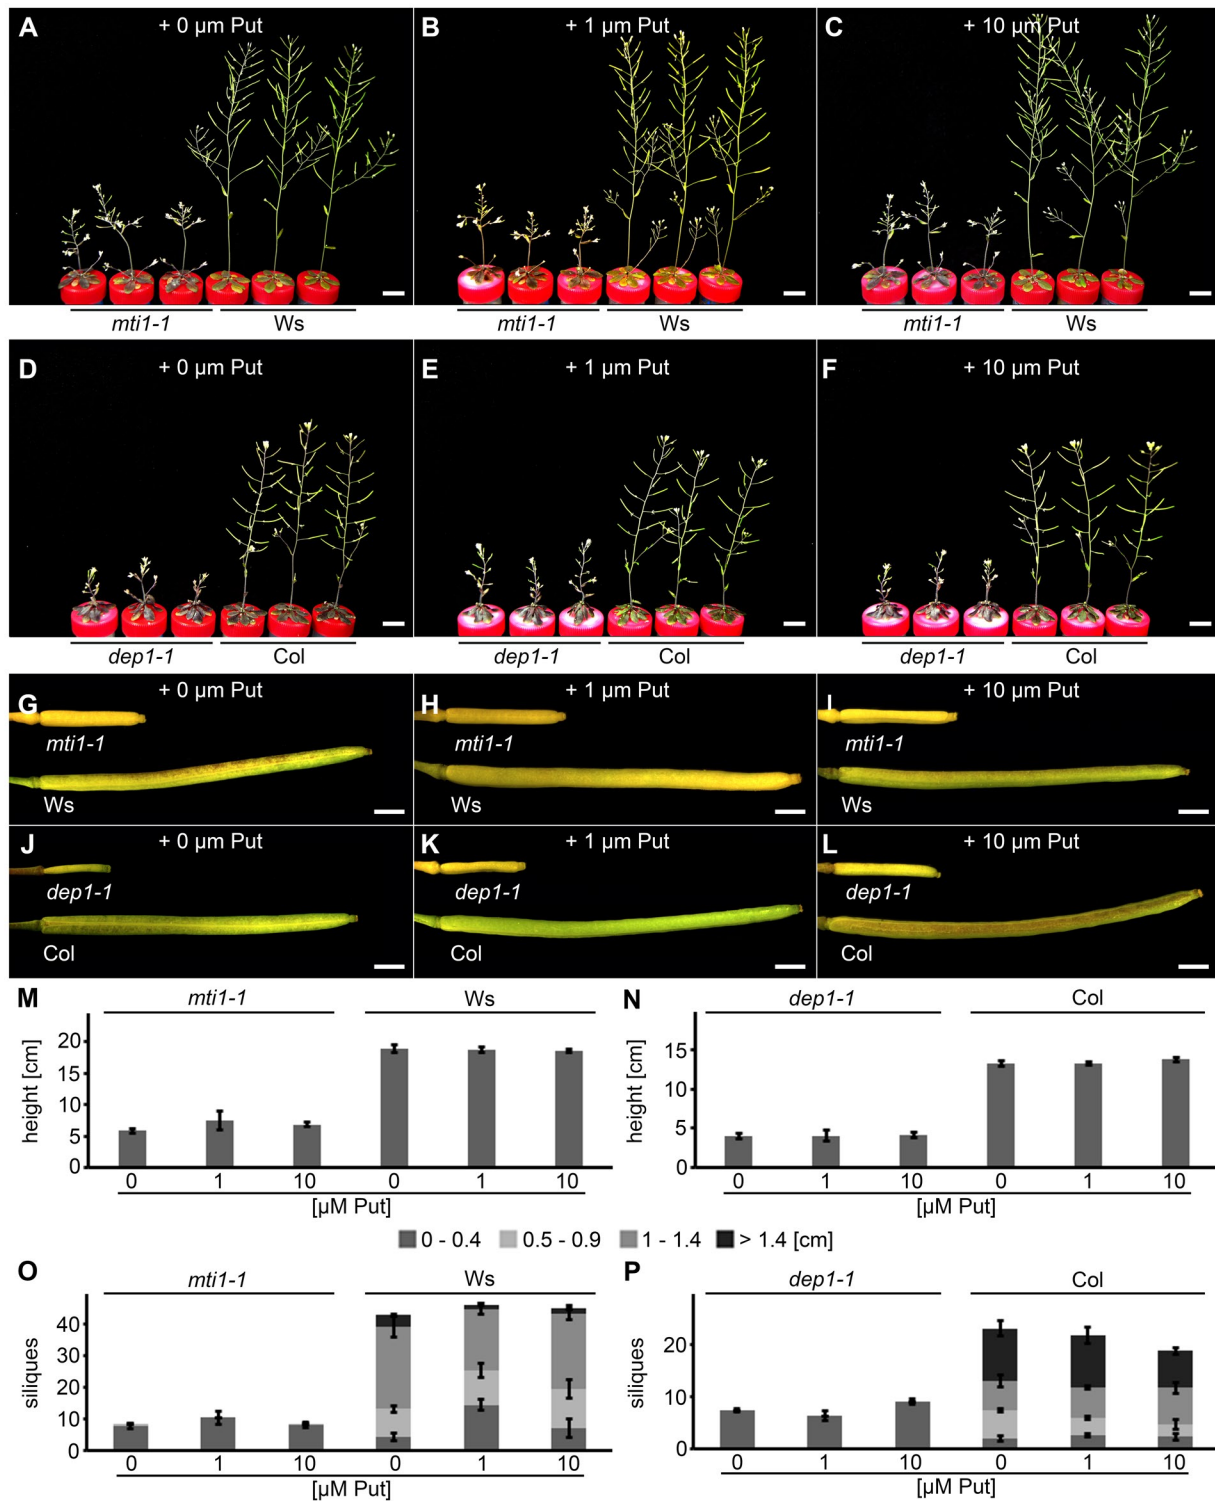



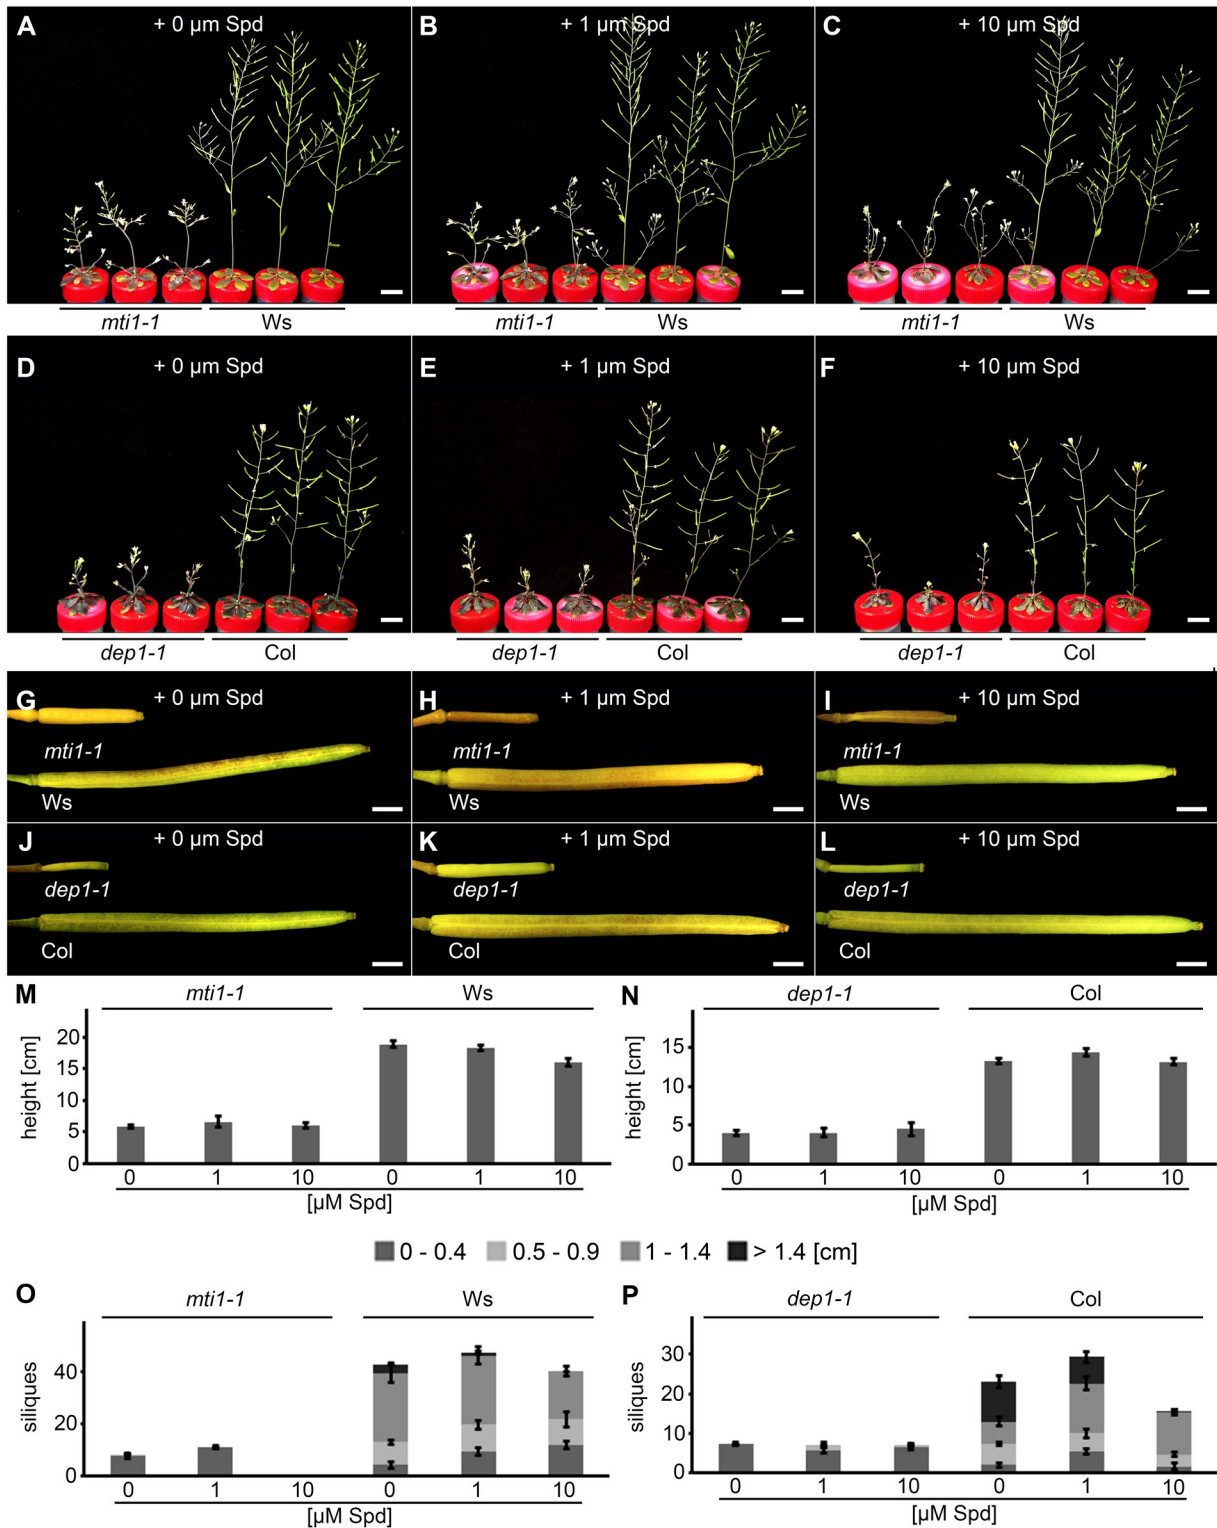

**Figure S6.** Chemical complementation of mutant phenotype with spermidine. (A-C) Growth of *mti1-1* and Ws plants in Hoagland medium containing 10  $\mu\text{M}$  sulfate supplemented with 0  $\mu\text{M}$  (A), 1  $\mu\text{M}$  (B) or 10  $\mu\text{M}$  (C) spermidine. (D-F) Growth of *dep1-1* and Col plants in liquid medium containing 10  $\mu\text{M}$  sulfate supplemented with 0  $\mu\text{M}$  (D), 1  $\mu\text{M}$  (E) or 10  $\mu\text{M}$  (F) spermidine. (G-I) Siliques of *mti1-1* and Ws plants grown in Hoagland medium containing 10  $\mu\text{M}$  sulfate and either 0  $\mu\text{M}$ , 1  $\mu\text{M}$  or 10  $\mu\text{M}$  spermidine. (J-L) Siliques of *dep1-1* and Col plants grown in Hoagland medium containing 10  $\mu\text{M}$  sulfate and either 0  $\mu\text{M}$ , 1  $\mu\text{M}$  or 10  $\mu\text{M}$  spermidine. (M) Inflorescence height of *mti1-1* and Ws plants grown in Hoagland medium containing 10  $\mu\text{M}$  sulfate and either 0  $\mu\text{M}$ , 1  $\mu\text{M}$  or 10  $\mu\text{M}$  spermidine. (N) Inflorescence height of *dep1-1* and Col plants grown in Hoagland medium containing 10  $\mu\text{M}$  sulfate and either 0  $\mu\text{M}$ , 1  $\mu\text{M}$  or 10  $\mu\text{M}$  spermidine. (O) Silique number and length of *mti1-1* and Ws plants grown in Hoagland medium containing 10  $\mu\text{M}$  sulfate and either 0  $\mu\text{M}$ , 1  $\mu\text{M}$  or 10  $\mu\text{M}$  spermidine. (P) Silique number and length of *dep1-1* and Col plants grown in Hoagland medium containing 10  $\mu\text{M}$  sulfate and either 0  $\mu\text{M}$ , 1  $\mu\text{M}$  or 10  $\mu\text{M}$  spermidine. Siliques were grouped into 4 categories (0–0.4 cm, 0.5–0.9 cm, 1–1.4 cm, >1.4 cm). Bars represent mean values and standard errors calculated with data from 4 plants per genotype. Scale bars are 1 cm in A-F and 1 mm in G-L.

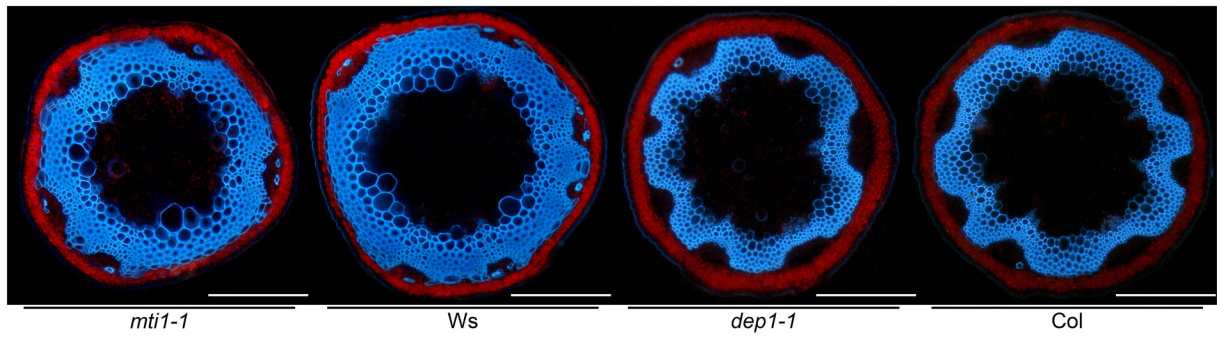

**Figure S7.** Stem cross sections of plants grown in 10  $\mu$ M sulfate. Cross sections of *mti1-1*, Ws, *dep1-1* and Col plants grown in Hoagland medium containing 10  $\mu$ M sulfate. Stem cross sections were excited with UV light and monitored using a DAPI filter. Blue = fluorescence of lignins in the xylem. Red = fluorescence of chlorophyll. Scale bars are 20  $\mu$ m.
